# Supplementary material
Source: PubMed Central journal article supplement (PMC4309393)
Supplement: NIHMS643907-supplement-01.pdf [file NIHMS643907-supplement-01.pdf]

**Supplementary Table 1.** Primer sequences.

| Gene       | Forward Primer (5'-3') | Reverse Primer (5'-3) | Product Size (bp) |
|------------|------------------------|-----------------------|-------------------|
| RNA pol II | AGGGCGGCGAGGACATGGAT   | CGACGGCTGGTAGTGACCGC  | 95                |
| Dilp2      | CGACAGCGATCTGGACGCC    | AGGGCACTTCGCAGCGGTTT  | 93                |
| Dilp3      | GGCCGCAAAGTCCCGAAAC    | ACGGGGTCCAAAGTTCTTGGT | 80                |
| Dilp5      | AGCAGCAGTTCAGCAAGGCA   | GTTTGC GGCTGGGCGGATA  | 93                |
| UCP5       | CCAACGAACGCGGCTTGCTG   | GAAGAGATCGCTCCCGCCGC  | 91                |
| UCP4b      | TCTTAGCCGGCGCAACTGCC   | AGACGCCGCTGTCCCTCCAT  | 88                |
| UCP4c      | GCCGGCTTCTCGGCAATGGT   | GGGCGCCGGAAAACGTCGTA  | 80                |
| HSP70      | ACCAAGGGGTGTGCCCCAGA   | CTTGGCTTGCCCGTGCTCA   | 97                |
| HSP22      | TTGGCGGATGGCCGAGGAGA   | AGCGCCACACTCCAAACGGG  | 93                |
